# Supplementary material for: Modification of cellulose paper with polydopamine as a thin film microextraction phase for detection of nitrophenols in oil samples
Source: Royal Society of Chemistry journal article supplement (doi:10.1039/c5ra23232e), 2016-01-01
Supplement: c5ra23232e1.pdf [file c5ra23232e1.pdf]

## **Supplementary Material**

### **Modification of cellulose paper with polydopamine as a thin film microextraction phase for determination of nitrophenols in oil samples**

Cunling Ye<sup>1\*</sup>, Yujun Wu<sup>1</sup>, Zhike Wang<sup>2</sup>

(1 School of Chemistry and Chemical Engineering, Henan Normal University, Xinxiang 453007, China

2 School of Environment, Henan Key Laboratory for Environmental Pollution Control, Key Laboratory for

Yellow River and Huai River Water Environment and Pollution Control, Ministry of Education, Henan

Normal University, Xinxiang 453007, China )

\*Corresponding Author: Cunling Ye

Tel: 86-373-3326335

**E-mail: [ycl@htu.cn](mailto:ycl@htu.cn)**

## Results and discussion section

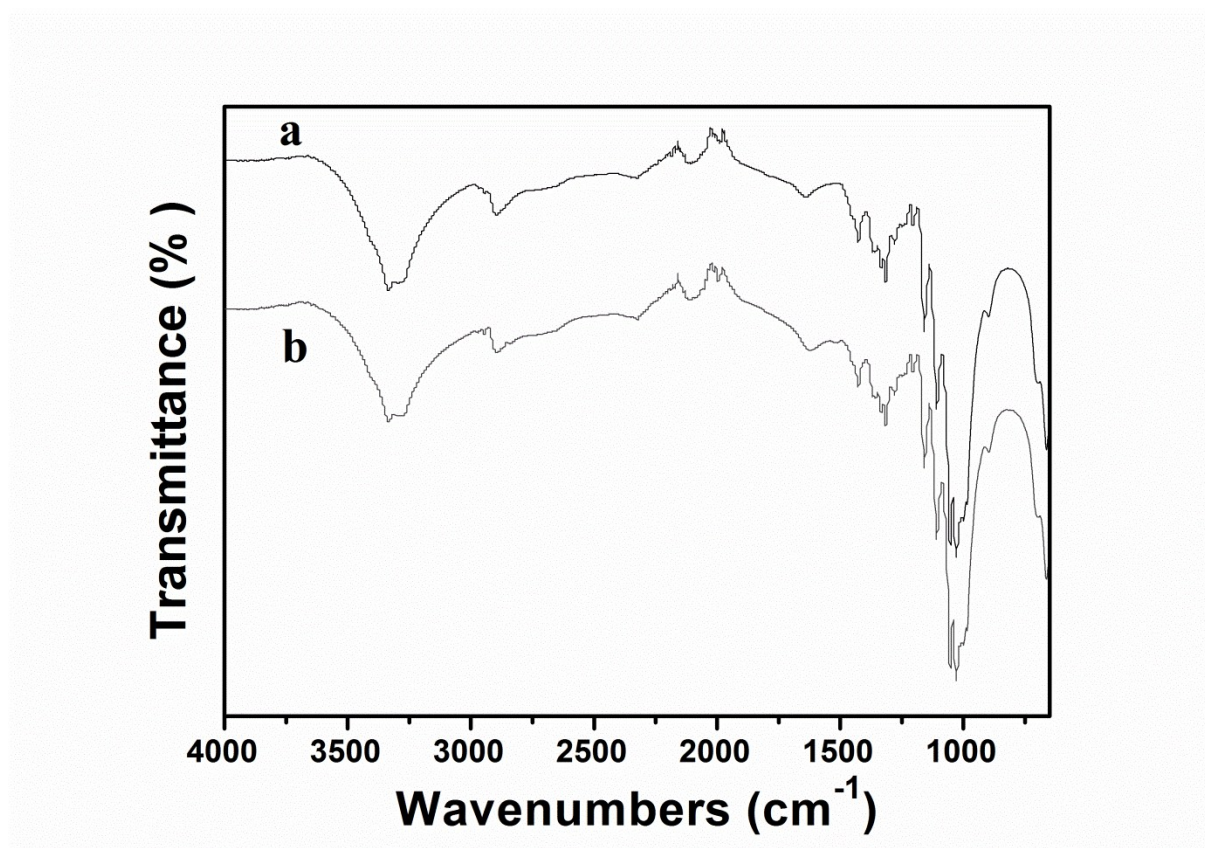

**Fig. S1** FT-IR spectra of cellulose filter papers (a) and PDA modified cellulose papers (b).

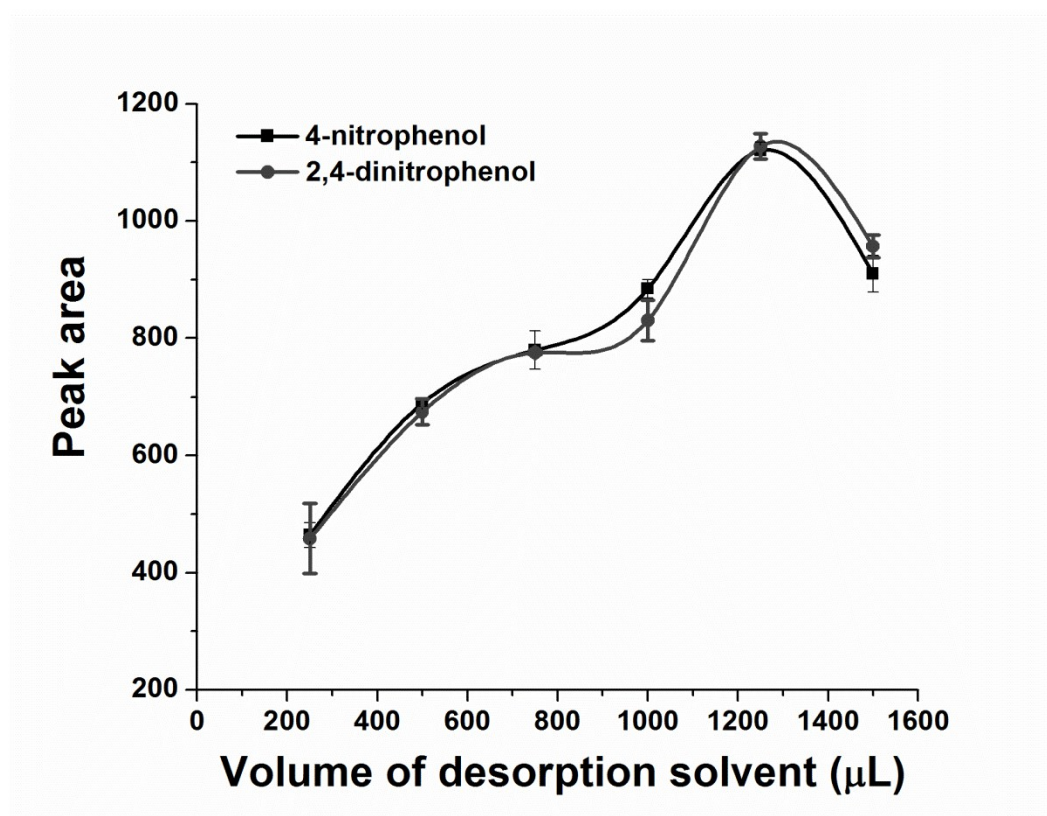

**Fig. S2** Effect of volume of desorption solvent on the extracted amounts of the phenolic compounds (1000  $\mu\text{L}$  oil; concentration of phenolic compounds,  $200 \mu\text{g L}^{-1}$ ; 9 mL n-hexane; 10  $\mu\text{L}$   $2 \text{ mol L}^{-1}$  NaOH; shaking rate, 150 rpm; extraction temperature,  $30^\circ\text{C}$ ; time of extraction, 150 min; desorption solvent, 25  $\mu\text{L}$  hydrochloric acid in 2.5 mL acetonitrile; time of desorption, 10 min).

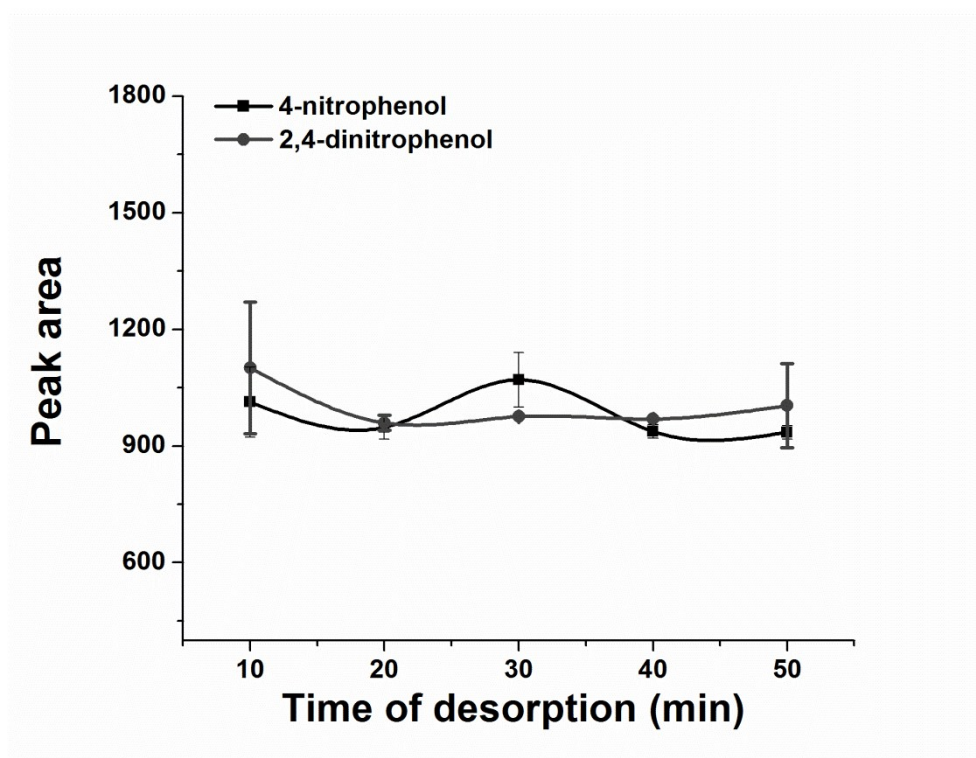

**Fig. S3** Effect of time of desorption solvent on the extracted amounts of the phenolic compounds (1000  $\mu\text{L}$  oil; concentration of phenolic compounds,  $200 \mu\text{g L}^{-1}$ ; 9 mL n-hexane; 10  $\mu\text{L}$   $2 \text{ mol L}^{-1}$  NaOH; shaking rate, 150 rpm; extraction temperature,  $30 \text{ }^{\circ}\text{C}$ ; time of extraction, 150 min; desorption solvent, 25  $\mu\text{L}$  hydrochloric acid in 2.5 mL acetonitrile; volume of desorption, 1250  $\mu\text{L}$ ).

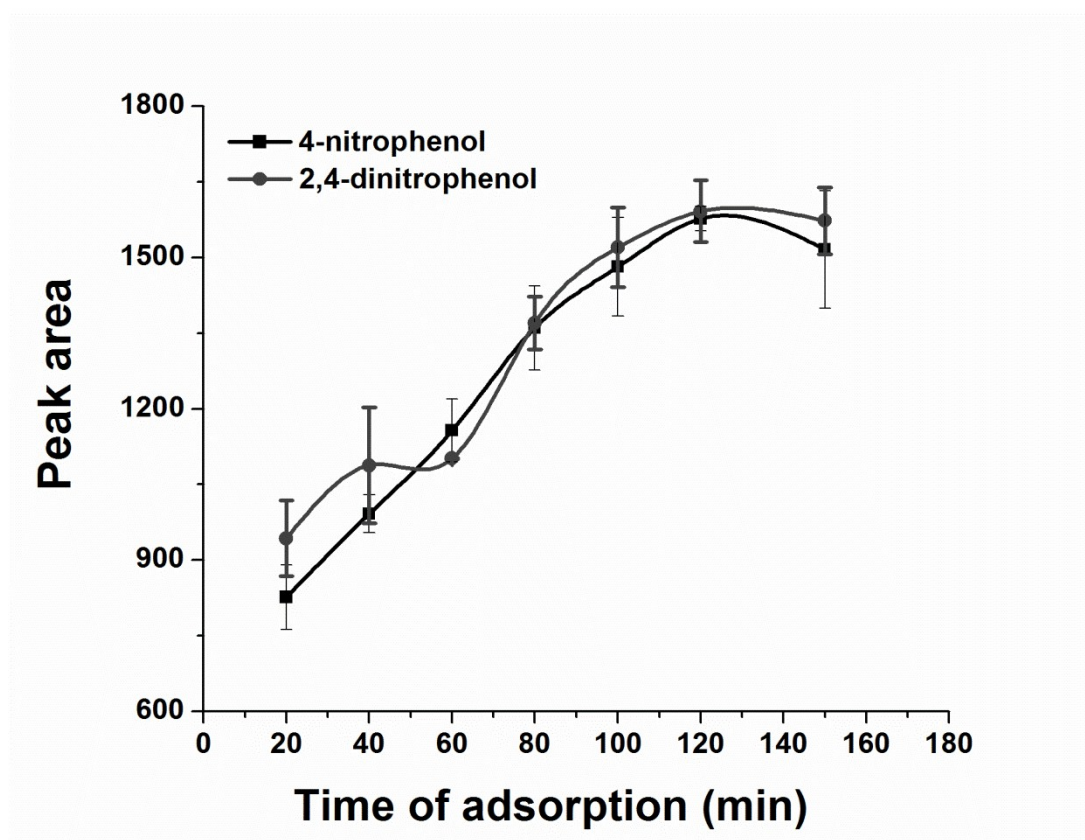

**Fig. S4** Effect of time of adsorption on the extracted amounts of the phenolic compounds (1000  $\mu\text{L}$  oil; concentration of phenolic compounds,  $200 \mu\text{g L}^{-1}$ ; 9 mL n-hexane; 5  $\mu\text{L}$  2 mol  $\text{L}^{-1}$  NaOH; shaking rate, 150 rpm; extraction temperature,  $30^\circ\text{C}$ ; desorption solvent, 25  $\mu\text{L}$  hydrochloric acid in 2.5 mL acetonitrile; volume of desorption, 1250  $\mu\text{L}$ ; time of desorption, 10 min).
